# Supplementary material for: Using WhatsApp and Facebook Online Social Groups for Smoking Relapse Prevention for Recent Quitters: A Pilot Pragmatic Cluster Randomized Controlled Trial
Source: PubMed Central journal article supplement (PMC4642789; doi:10.2196/jmir.4829), 2015-10-22
Supplement: jmir_v17i10e238_app7.pdf [file jmir_v17i10e238_app7.pdf]

**Multimedia Appendix 7 Minnesota Nicotine Withdrawal Scale (Chinese): Negative affect subscale.**

Remark: The Negative Affect subscale included the intensity of (1) bad mood, (2) easily get angry/frustrated, (3) feel anxious and (4) difficult to concentrate; 0= Never, 1= Mild, 2= Moderate, 3= Severe, 4= Very severe

General linear model repeated measures analysis: Time effect  $P < .01$ ; Group effect (A versus C)  $P = .44$ ; Group effect (B versus C)  $P = .96$ ; Interaction of time and group (A versus C)  $P = .75$ ; Interaction of time and group (B versus C)  $P = .85$
